# Supplementary material for: Research on the stability of loess landslides under seismic action based on simplified bishop method
Source: Frontiers journal article supplement (doi:10.3389/feart.2024.1490558), 2024-11-27
Supplement: Data_Sheet_1.zip [file Data_Sheet_1.zip]

Supplementary Material

The images in the compressed file show the calculation results of 32 landslide profiles. Similar to the example diagram in the paper, we label the slope height and slope angle with numbers in the images. The impact range of slope sliding, i.e. the avoidance distance, is also marked. The number marked around the red dot in the upper part of the diagram indicates the safety coefficient value of the profile.
